# Supplementary material
Source: Springer Nature journal article supplement (https://www.springermedizin.de/resource/supplementary/12885_2008_1517_MOESM6_ESM.pdf/9472220)

FEMX - LfcinB

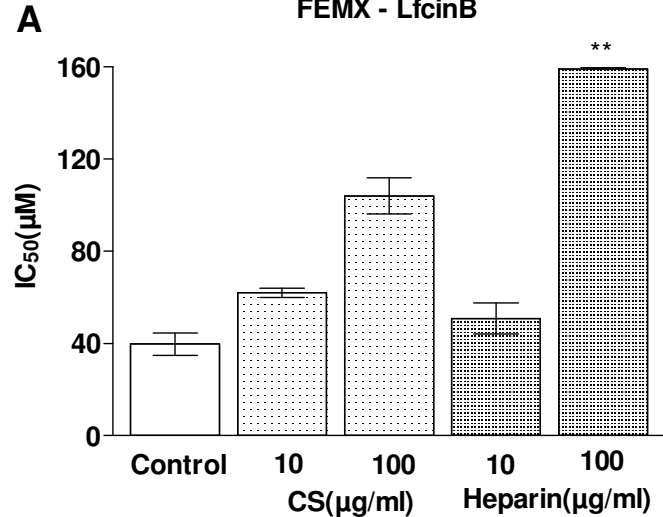

HT-29 - LfcinB

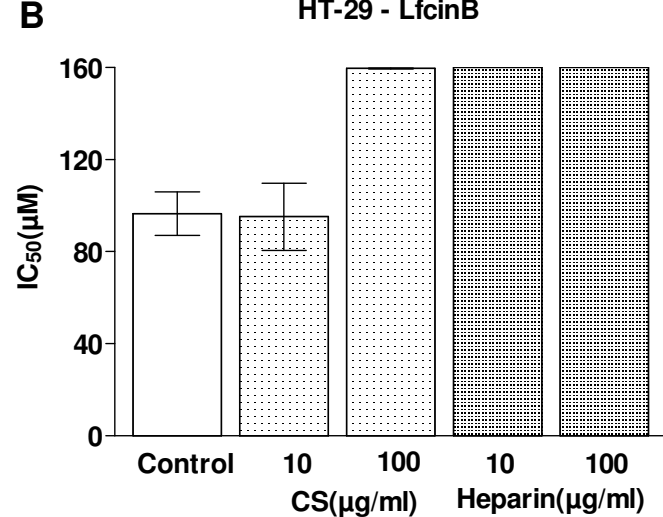

FEMX - KW5

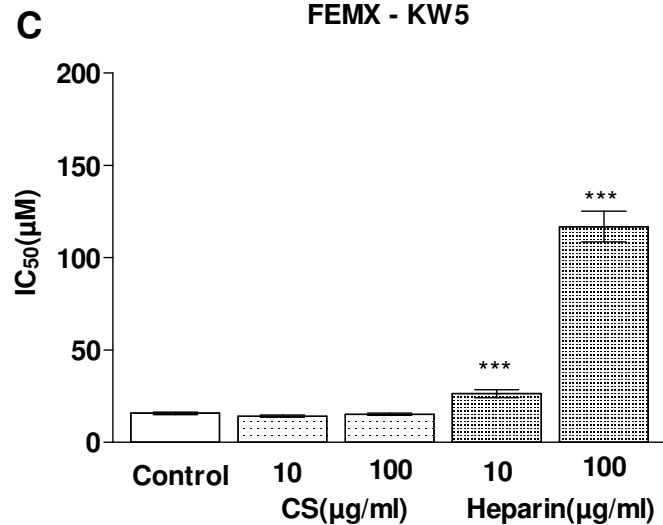

HT-29 - KW5

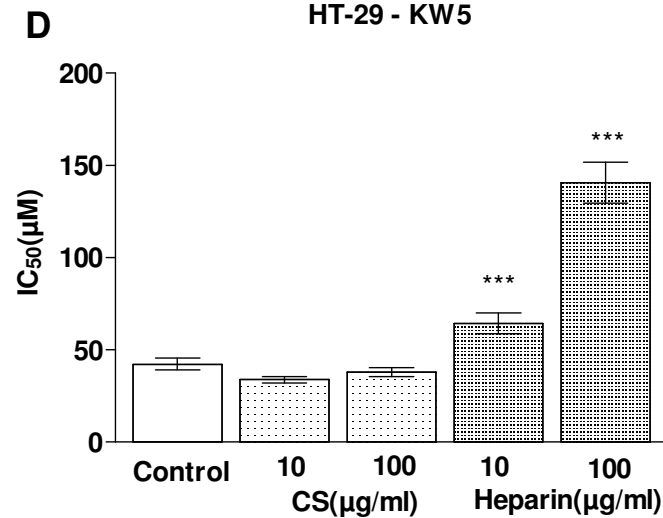

Supplement: MOESM6 [file 9472220]
